# Supplementary material
Source: PubMed Central journal article supplement (PMC7484250)
Supplement: NIHMS1601559-supplement-1.pdf [file NIHMS1601559-supplement-1.pdf]

## Supplementary Material

### Chemically Functionalized Conical PET Nanopore for Protein Detection at the Single-molecule Level

Youwen Zhang<sup>a</sup>, Xiaohan Chen<sup>a</sup>, Ceming Wang<sup>b</sup>, Golbarg M Roozbahani<sup>a</sup>, Hsueh-Chia Chang<sup>b</sup>, and Xiyun Guan<sup>a,\*</sup>

<sup>a</sup> Department of Chemistry, Illinois Institute of Technology, 3101 S Dearborn St, Chicago, IL 60616

<sup>b</sup> Department of Chemical and Biomolecular Engineering, University of Notre Dame, Notre Dame, IN 46556

#### Table of Contents:

|                                                                                                                                                    |     |
|----------------------------------------------------------------------------------------------------------------------------------------------------|-----|
| <b>Table S1.</b> Properties of Proteins.....                                                                                                       | S-2 |
| <b>Figure S1.</b> The current-voltage (I-V) curve of a single PET conical nanopore at an applied voltage bias ranging from -100 mV to +100 mV..... | S-3 |
| <b>Figure S2.</b> Schematic illustration of the 2-step coupling method for asymmetric modification of the single conical PET nanopore.....         | S-4 |
| <b>Figure S3.</b> Current-voltage (I-V) curves of a single PET conical nanopore at different solution pHs .....                                    | S-5 |
| <b>Figure S4.</b> An uninterrupted 2-min single channel recording trace segment of HIV-1 PR in the amine-modified PET nanopore .....               | S-6 |
| <b>Figure S5.</b> Plot of event frequency versus HIV-1 protease concentration.....                                                                 | S-7 |
| <b>Figure S6.</b> Selectivity study of the PET nanopore sensor.....                                                                                | S-8 |

**Table S1. Properties of Proteins**

| Proteins | Size or Diameter (nm)       | Molecular Mass (kDa) | Isoelectric Point (pI)    | Net charge at pH 7.5 |
|----------|-----------------------------|----------------------|---------------------------|----------------------|
| HIV-1 PR | 4.5×2.3×2.5 <sup>[s1]</sup> | 10.8                 | 9.1 <sup>[s2]</sup>       | +1.60                |
| Trypsin  | 3.8×3.8×3.8 <sup>[s3]</sup> | 24                   | 10.1-10.5 <sup>[s4]</sup> | +3.78                |
| BSA      | 4×4×14 <sup>[s5]</sup>      | 66.4 <sup>[s6]</sup> | 5.4 <sup>[s6]</sup>       | -22.06               |
| HSA      | 3×8×8 <sup>[s7]</sup>       | 66.4 <sup>[s8]</sup> | 4.7 <sup>[s8]</sup>       | -16.48               |

\*The net charges of the proteins were estimated using an online tool (<https://www.protpi.ch/Calculator/ProteinTool>).

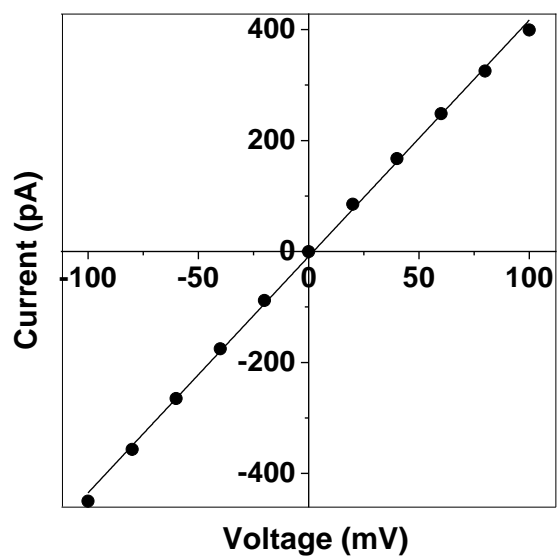

**Figure S1.** The current-voltage (I-V) curve of a single PET conical nanopore at an applied voltage bias ranging from -100 mV to +100 mV. The experiment was performed in an electrolyte solution containing 1 M KCl and 1 mM EDTA (pH 7.5). The diameters of the *tip* and *base* of the PET nanopore are  $\sim 5.6$  and  $\sim 1000$  nm, respectively. The linear regression equation for the current-voltage relationship is  $y = 4.261x - 8.969$ ,  $r^2 = 0.9988$ .

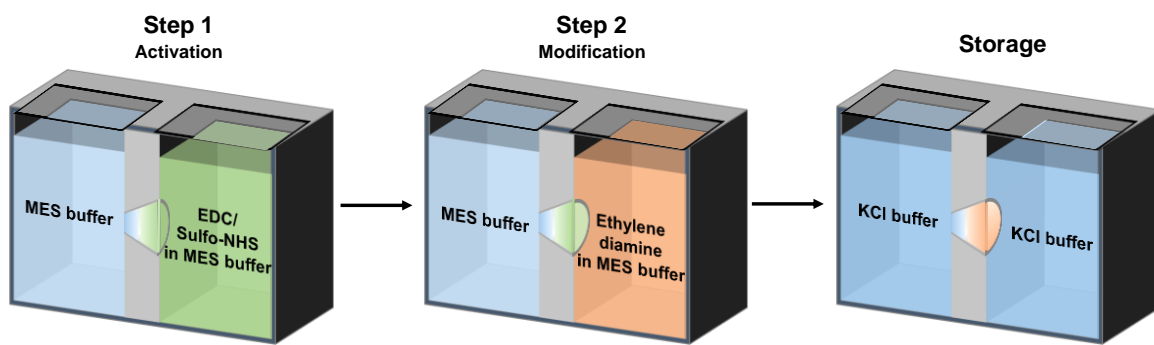

**Figure S2.** Schematic illustration of the 2-step coupling method for asymmetric modification of the single conical PET nanopore.

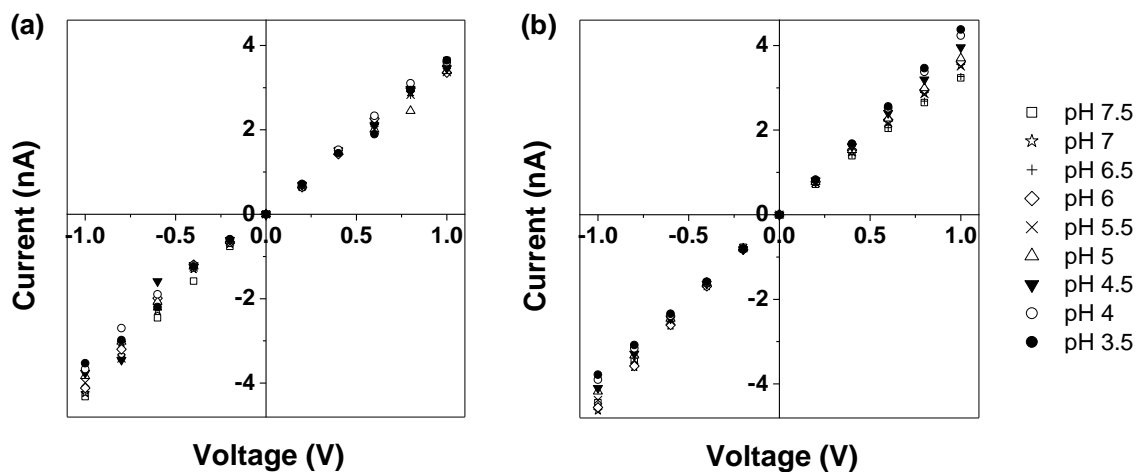

**Figure S3.** Current-voltage (I-V) curves of a single PET conical nanopore at different solution pHs: (a) before and (b) after chemical modification. Experiments were performed in electrolyte solutions containing 1 M KCl and 1 mM EDTA with different pH values ranging from 3.5 to 7.5.

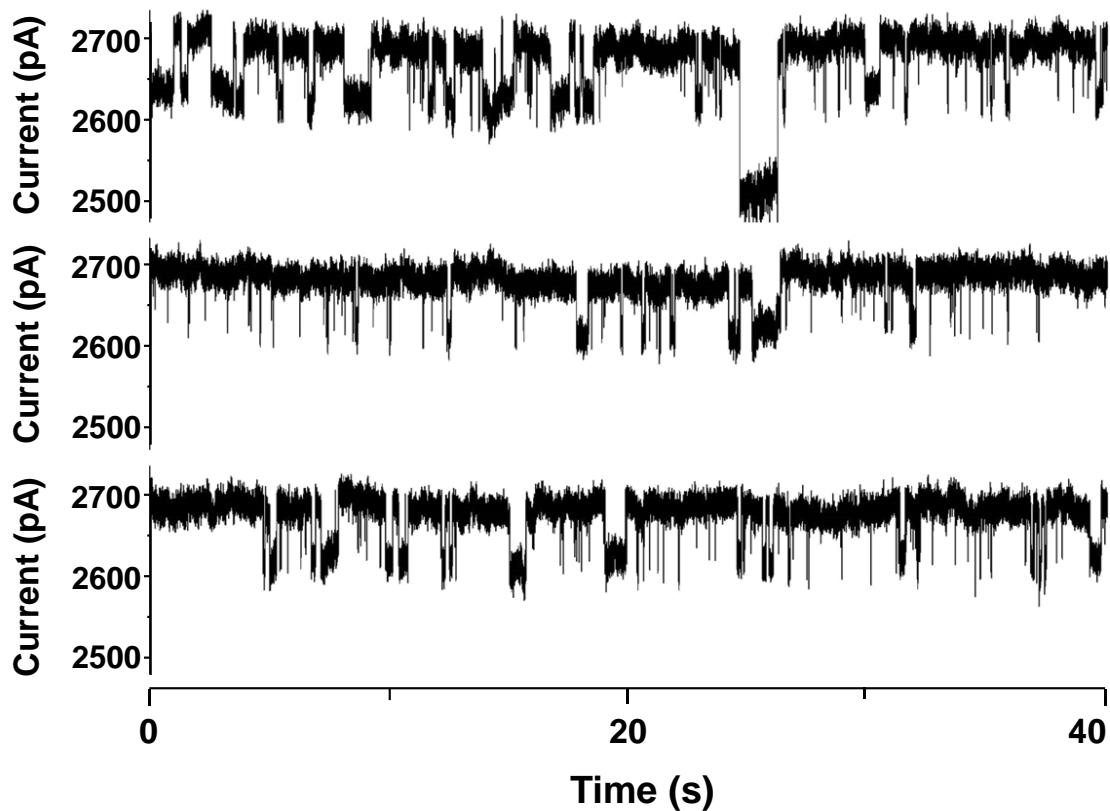

**Figure S4.** An uninterrupted 2-min single-channel recording trace segment of HIV-1 PR in the amine-modified PET nanopore. The experiment was performed at +800 mV in a solution comprising 1 M KCl and 10 mM Tris (pH 7.5). The concentration of HIV-1 PR used was 100 ng/mL.

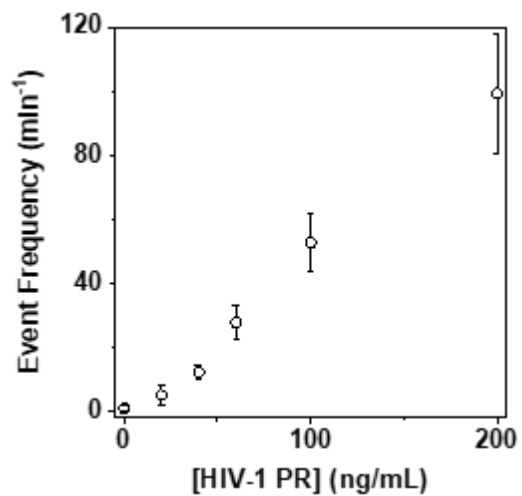

**Figure S5.** Plot of event frequency versus HIV-1 protease concentration. The experiments were performed at +800 mV using the amine modified PET nanopore in a solution comprising 1 M KCl and 10 mM Tris (pH 7.5).

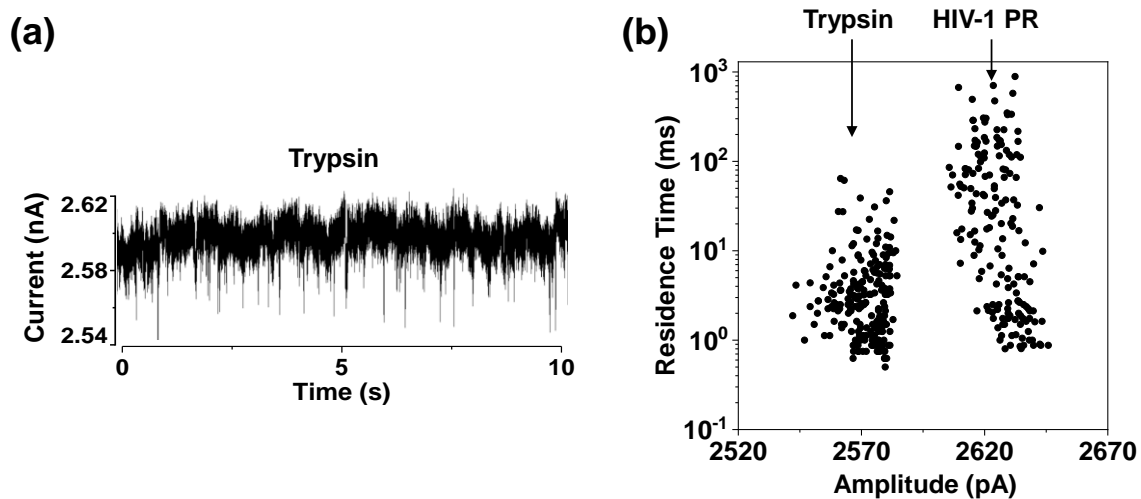

**Figure S6.** Selectivity study of the PET nanopore. (a) Typical single-channel recording trace segment of trypsin in the PET nanopore, and (b) the scatter plot of residence time vs. residual current of the trypsin and HIV-1 PR events, showing that these two protein species could be well differentiated. Both the experiments were performed at +800 mV in a solution comprising 1 M KCl and 10 mM Tris (pH 7.5). The concentrations of trypsin and HIV-1 PR were 100 ng/mL each.



## References

- S1. Frutos S, Tulla-Puche J, Albericio F, Giralt E. Chemical Synthesis of <sup>19</sup>F-labeled HIV-1 Protease using Fmoc-Chemistry and ChemMatrix Resin. *Int J Pept Res Ther* 2007, **13**(1): 221-227.
- S2. Potempa M, Nalivaika E, Ragland D, Lee S-K, Schiffer CA, Swanstrom R. A Direct Interaction with RNA Dramatically Enhances the Catalytic Activity of the HIV-1 Protease In Vitro. *J Mol Biol* 2015, **427**(14): 2360-2378.
- S3. Zhou S, Wang L, Chen X, Guan X. Label-Free Nanopore Single-Molecule Measurement of Trypsin Activity. *ACS Sensors* 2016, **1**(5): 607-613.
- S4. Walsh KA. [4] Trypsinogens and trypsins of various species. *Methods in Enzymology*, vol. 19. Academic Press, 1970, pp 41-63.
- S5. Wright AK, Thompson MR. Hydrodynamic structure of bovine serum albumin determined by transient electric birefringence. *Biophys J* 1975, **15**(2 Pt 1): 137-141.
- S6. Shi Q, Zhou Y, Sun Y. Influence of pH and Ionic Strength on the Steric Mass-Action Model Parameters around the Isoelectric Point of Protein. *Biotechnol Prog* 2005, **21**(2): 516-523.
- S7. Liu C, Liu Z, Wang J. Uncovering the molecular and physiological processes of anticancer leads binding human serum albumin: A physical insight into drug efficacy. *PLoS One* 2017, **12**(4): e0176208.
- S8. Vlasova IM, Saletsky AM. Study of the denaturation of human serum albumin by sodium dodecyl sulfate using the intrinsic fluorescence of albumin. *Journal of Applied Spectroscopy* 2009, **76**(4): 536-541.
